# Supplementary material for: Expanding the amyloid landscape: structural plasticity of antimicrobial peptides
Source: Research Square preprint supplement (doi:10.21203/rs.3.rs-8249669/v1), 2026-01-27
Supplement: Supplementary file 1 [file daa1e6e9fd65ff9e8973e6a5.pdf]

## **SUPPLEMENTARY MATERIALS**

### **Expanding the amyloid landscape: structural plasticity of antimicrobial peptides**

Peleg Ragonis-Bachar<sup>#</sup>, Fabio Strati<sup>#</sup>, Emil Gustavsson<sup>#</sup>, Alexander Khokhlov, Bader Rayan, Eilon Barnea, Alexander Upcher, and Meytal Landau

<sup>#</sup> Equal contribution

#### **Supplementary Tables and Figures:**

Supplementary Tables S1-S5

Supplementary Figures S1-S10

**Table S1. Database statistics, bioinformatic scheme thresholds and numerical results of prediction**

| SwissProt Keyword                                                                             | Antimicrobial | Amphibian defence peptide | antiviral defence | antiviral protein | pathogenic related proteins | prion   | virulence | toxin   |
|-----------------------------------------------------------------------------------------------|---------------|---------------------------|-------------------|-------------------|-----------------------------|---------|-----------|---------|
| SwissProt keyword code                                                                        | KW-0929       | KW-0878                   | KW-0051           | KW-0930           | KW-0568                     | KW-0640 | KW-0843   | KW-0800 |
| Number of peptides                                                                            | 53777         | 1685                      | 111241            | 1506              | 11010                       | 2494    | 151778    | 90613   |
| Minimal length                                                                                | 35            |                           |                   |                   |                             |         |           |         |
| Number of short peptides                                                                      | 897           | 623                       | 74                | 21                | 44                          | 24      | 101       | 1383    |
| Prediction of $\alpha$ -helical FF peptides                                                   |               |                           |                   |                   |                             |         |           |         |
| Secondary structure was predicted by Jpred <sup>37</sup>                                      |               |                           |                   |                   |                             |         |           |         |
| Minimal length of consecutive residues predicted to have the same SS                          | 5             |                           |                   |                   |                             |         |           |         |
| Minimal gap length between residues predicted to have a SS                                    | 3             |                           |                   |                   |                             |         |           |         |
| Minimal $\alpha$ -helix average score                                                         | 7             |                           |                   |                   |                             |         |           |         |
| Number of peptides passing secondary structure thresholds using Jpred                         | 631           | 467                       | 31                | 8                 | 32                          | 21      | 81        | 343     |
| Minimal $\mu$ H ( $\alpha$ -helix amphipathicity)                                             | 0.46          | 0.45                      | 0.45              | 0.5               | 0.5                         | 0.17    | 0.63      | 0.48    |
| Number of peptides passing the $\mu$ H threshold (predicted as $\alpha$ -helical FF peptides) | 314           | 230                       | 15                | 4                 | 16                          | 5       | 60        | 179     |
| Prediction of SSW FF peptides                                                                 |               |                           |                   |                   |                             |         |           |         |
| Secondary structure was predicted by Tango <sup>1</sup>                                       |               |                           |                   |                   |                             |         |           |         |

|                                                                                          |      |      |      |      |      |     |      |      |
|------------------------------------------------------------------------------------------|------|------|------|------|------|-----|------|------|
| Minimal length of consecutive residues predicted to have the same SS                     | 5    |      |      |      |      |     |      |      |
| Minimal gap length between residues predicted to have a SS                               | 3    |      |      |      |      |     |      |      |
| Number of peptides passing minimal consecutive residues and gap length thresholds        | 440  | 262  | 43   | 6    | 18   | 9   | 48   | 591  |
| Maximal difference between $\alpha$ -helix and beta SS propensity scores                 | 1.67 | 1.26 | 2.52 | 2.2  | 1.72 | 2.3 | 3.34 | 2.4  |
| Minimal hydrophobicity (H)                                                               | 0.46 | 0.5  | 0.51 | 0.56 | 0.52 | 0.7 | 0.49 | 0.42 |
| Number of peptides passing the H threshold (predicted as SSW FF peptides)                | 181  | 90   | 22   | 3    | 8    | 5   | 31   | 313  |
| Number of peptides predicted to be both $\alpha$ -helical and SSW FF-peptides            | 96   | 46   | 1    | 1    | 5    | 0   | 30   | 67   |
| Number of peptides with antimicrobial annotation                                         | 897  | 400  | 4    | 9    | 0    | 0   | 0    | 92   |
| Number of antimicrobial peptides predicted as both $\alpha$ -helical and SSW FF-peptides | 96   | 36   | 0    | 1    | 0    | 0   | 0    | 20   |

For each functional group, defined by SwissProt keywords, the total number of proteins and the number of peptides shorter than 35 residues are indicated. Two computational routes for predicting fibril-forming (FF) peptides are shown:  $\alpha$ -helical and  $\alpha/\beta$  secondary structure-switching (SSW) pathways. For each route, the method used to calculate secondary structures (SS), the applied threshold values, and the number of peptides passing these thresholds are specified. Thresholds were either fixed (general cutoffs) or based on the average value calculated within each keyword-defined group. Finally, the number of short peptides in each group annotated (also) as antimicrobial is provided, along with the subset predicted as both  $\alpha$ -helical and SSW FF-peptides. In total, 835 unique sequences were identified as  $\alpha$ -helical or  $\alpha/\beta$  secondary structure-switching fibril-forming peptides.

**Table S2. Source organisms and sequences of the experimentally tested peptides**

| Title                                                  | Source organism                                                                   | Sequence                   |
|--------------------------------------------------------|-----------------------------------------------------------------------------------|----------------------------|
| Brevinin-1OKc                                          | Nidirana okinavana (Kampira Falls frog) ( <i>Babina okinavana</i> )               | FFGSIIGALAKGLPSLISLIKK-NH2 |
| Osmin                                                  | <i>Osmia rufa</i> (Red mason bee)                                                 | GFLSALKKYLPIVLKHV-NH2      |
| Chrysopsin-3                                           | <i>Pagrus major</i> (Red sea bream) ( <i>Chrysophrys major</i> )                  | FIGLLISAGKAIHDLIRRRH-NH2   |
| Melectin                                               | <i>Melectaalbifrons</i> (Cuckoo bee) ( <i>Melecta punctata</i> )                  | GFLSILKKVLPKVMAMHK-NH2     |
| Phylloseptin-2.1TR                                     | <i>Phyllomedusa trinitatis</i> (Trinidad leaf frog)                               | FLSLIPHATGIAALAKHL-NH2     |
| Polybia-CP                                             | <i>Polybia paulista</i> (Neotropical social wasp) (Swarm-founding polistine wasp) | ILGTILGLLKSL-NH2           |
| Grammistin Pp 2a                                       | <i>Pogonoperca punctata</i> (Clown grouper) ( <i>Grammistes punctatus</i> )       | FIGGIISLIKKLF              |
| Panurgin 1                                             | <i>Panurgus calcaratus</i> (Solitary bee)                                         | LNWGAILKHIK-NH2            |
| Temporin-1ITa                                          | <i>Rana italica</i> (Italian stream frog) ( <i>Rana graeca italica</i> )          | FLGAIAQALTSLLGKL-NH2       |
| Hemolysin H2U                                          | <i>Staphylococcus cohnii</i> subsp. <i>urealyticus</i>                            | MDFIIDIIKKIVGLFTGK         |
| Dahlein-5.6                                            | <i>Ranoidea dahlia</i> (Dahl's aquatic frog) ( <i>Litoria dahlia</i> )            | GLLASLGKVFGGYLAELKPK       |
| Eumenitin                                              | <i>Eumenes rubronotatus</i> (Solitary wasp)                                       | LNLKGIFKKVASLLT            |
| Decoralin                                              | <i>Oreumenes decoratus</i> (Potter wasp)                                          | SLLSLIRKLIT                |
| Vespid chemotactic peptide 5e (Vespid-CP 5e)           | <i>Vespa magnifica</i> (Hornet)                                                   | FLPIIAKLLGGLL              |
| Riparin-2.1                                            | <i>Crinia riparia</i> (Streambank froglet) (Flinders Ranges froglet)              | IIEKLVNTALGLLSGL-NH2       |
| Protonectin (Agelaia-chemotactic peptide - Agelaia-CP) | <i>Agelaia pallipes pallipes</i> (Neotropical social wasp)                        | ILGTILGLLKGL               |
| Aurein 1.2                                             | <i>Ranoidea raniformis</i> (Southern bell frog) ( <i>Litoria raniformis</i> )     | GLFDIIKKIAESF-NH2          |

**Table S3. Database annotations of the experimentally tested peptides**

| Title              | Uniprot | Uniprot Homologs | Uniprot Keyword                          | PDB | Pubmed                                                                    | GO                                                                                                                         |
|--------------------|---------|------------------|------------------------------------------|-----|---------------------------------------------------------------------------|----------------------------------------------------------------------------------------------------------------------------|
| Brevinin-1OKc      | C0HL10  |                  | Antimicrobial                            |     | 15629529                                                                  | GO:0005576<br>GO:0031640<br>GO:0050829<br>GO:0050830                                                                       |
| Osmin              | P0CD70  |                  | Antimicrobial                            |     | 19109988                                                                  | GO:0005576<br>GO:0042742<br>GO:0044179<br>GO:0050832<br>GO:0090729                                                         |
| Chrysopsin-3       | P83547  |                  | Antimicrobial                            |     | 12581207                                                                  | GO:0005576<br>GO:0006952<br>GO:0044179<br>GO:0050829<br>GO:0050830                                                         |
| Melectin           | P86170  |                  | Antimicrobial                            |     | 18942691                                                                  | GO:0005576<br>GO:0035895<br>GO:0044179<br>GO:0050829<br>GO:0050830<br>GO:1990142                                           |
| Phylloseptin-2.1TR | C0HLD7  | P84930           | Amphibian defense peptide, Antimicrobial |     | 29980138;<br>30734396                                                     | GO:0005576<br>GO:0042742<br>GO:0044179<br>GO:0045087<br>GO:0050832                                                         |
| Polybia-CP         | P0C1R0  |                  | Antimicrobial                            |     | 16129513;<br>21745529;<br>22450985;<br>23836163;<br>30534613;<br>32360153 | GO:0005576<br>GO:0006935<br>GO:0016020<br>GO:0050829<br>GO:0050830<br>GO:0050921                                           |
| Grammistin Pp 2a   | P69843  |                  | Antimicrobial                            |     | 15777955                                                                  | GO:0005576<br>GO:0042742<br>GO:0044179                                                                                     |
| Panurgin 1         | C0HL84  |                  | Antimicrobial                            |     | 23483218                                                                  | GO:0005576<br>GO:0016020<br>GO:0031640<br>GO:0044179<br>GO:0050829<br>GO:0050830<br>GO:0050832<br>GO:0051673<br>GO:0051715 |
| Temporin-1ITa      | C0HL49  |                  | Amphibian defense peptide, Antimicrobial |     | 28699258                                                                  | GO:0005576<br>GO:0042742<br>GO:0044179<br>GO:0050832                                                                       |

|               |        |        |                                                   |               |                                    |                                                                                                                                          |
|---------------|--------|--------|---------------------------------------------------|---------------|------------------------------------|------------------------------------------------------------------------------------------------------------------------------------------|
| Hemolysin H2U | P85223 | P85220 | Virulence                                         |               | 18752624                           | GO:0005576<br>GO:0044179<br>GO:0090729                                                                                                   |
| Dahlein-5.6   | P84272 |        | Amphibian<br>defense<br>peptide                   |               | 11555873                           | GO:0005576<br>GO:0006952<br>GO:0030235<br>GO:0051001                                                                                     |
| Eumenitin     | P0C931 |        | Antimicrobial                                     |               | 11006592;<br>16762455;<br>18206199 | GO:0005576<br>GO:0006811<br>GO:0016021<br>GO:0042742<br>GO:0043303                                                                       |
| Decoralin     | P85870 |        | Antimicrobial                                     | 2N9A          | 17981364;<br>27096870;<br>28267894 | GO:0005576<br>GO:0016020<br>GO:0019835<br>GO:0031640<br>GO:0042832<br>GO:0043303<br>GO:0043306<br>GO:0050829<br>GO:0050830<br>GO:0050832 |
| Vespid-CP 5e  | P0C1M1 |        | Antimicrobial                                     |               | 16330062                           | GO:0005576<br>GO:0042742<br>GO:0043303<br>GO:0044179<br>GO:0050832                                                                       |
| Riparin-2.1   | P86127 |        | Amphibian<br>defense<br>peptide,<br>Antimicrobial |               | 16470724;<br>18601958              | GO:0005576<br>GO:0050830                                                                                                                 |
| Agelaia-CP    | P69437 | P0C1R1 | Antimicrobial                                     | 6N68,<br>7JGY | 15052574;<br>15225564;<br>23836163 | GO:0005576<br>GO:0006935<br>GO:0016020<br>GO:0042742                                                                                     |
| Aurein 1.2    | P82387 |        | Amphibian<br>defense<br>peptide,<br>Antimicrobial | 1VM5          | 10951191                           | GO:0005576<br>GO:0042742                                                                                                                 |

**Table S4. Biochemical properties and secondary structure prediction of the experimentally tested peptides**

| Protein names      | Length | Charge | Hydrophobicity (full length) | uH (full length) | uH (helical part) | SS score difference | FF-peptide prediction |
|--------------------|--------|--------|------------------------------|------------------|-------------------|---------------------|-----------------------|
| Brevinin-1OKc      | 22     | 3      | 0.72                         | 0.58             | 0.61              | 0.23                | $\alpha$ -helix + SSW |
| Osmin              | 17     | 3      | 0.70                         | 0.53             | 0.51              | 1.31                | $\alpha$ -helix + SSW |
| Chrysopsin-3       | 20     | 3      | 0.51                         | 0.47             | 0.74              | 0.85                | $\alpha$ -helix + SSW |
| Melectin           | 18     | 4      | 0.60                         | 0.52             | 0.55              | 1.14                | $\alpha$ -helix + SSW |
| Phylloseptin-2.1TR | 19     | 1      | 0.81                         | 0.53             | 0.50              | 0.50                | $\alpha$ -helix + SSW |
| Polybia-CP         | 12     | 1      | 0.94                         | 0.68             | 0.63              | 1.60                | $\alpha$ -helix + SSW |
| Grammistin Pp 2a   | 13     | 2      | 0.94                         | 0.75             | 0.75              | 1.44                | $\alpha$ -helix + SSW |
| Panurgin 1         | 12     | 2      | 0.74                         | 0.54             | 0.79              | 1.50                | $\alpha$ -helix       |
| Temporin-1ITa      | 16     | 1      | 0.75                         | 0.60             | 0.60              | 0.13                | $\alpha$ -helix + SSW |
| Hemolysin H2U      | 18     | 1      | 0.69                         | 0.55             | 0.65              | 1.52                | $\alpha$ -helix + SSW |
| Dahlein-5.6        | 21     | 3      | 0.44                         | 0.34             | 0.62              | 0.46                | $\alpha$ -helix + SSW |
| Eumenitin          | 15     | 3      | 0.57                         | 0.46             | 0.67              | 0.78                | $\alpha$ -helix + SSW |
| Decoralin          | 11     | 2      | 0.78                         | 0.65             | 0.71              | 0.19                | $\alpha$ -helix + SSW |
| Vespid-CP 5e       | 13     | 1      | 1.07                         | 0.61             | 0.56              | 0.43                | $\alpha$ -helix + SSW |
| Riparin-2.1        | 16     | 0      | 0.73                         | 0.58             | 0.60              | 1.18                | $\alpha$ -helix + SSW |
| Agelaia-CP         | 12     | 1      | 0.95                         | 0.68             | 0.63              | 1.02                | $\alpha$ -helix + SSW |
| Aurein-1.2         | 13     | 0      | 0.58                         | 0.77             | 0.83              | 0.45                | $\alpha$ -helix + SSW |

Biochemical properties of the selected peptides, including peptide length, net charge at pH 7.4, overall hydrophobicity (H), and hydrophobic moment ( $\mu$ H) calculated for both the full-length sequence and the predicted  $\alpha$ -helical segment. The table also includes the average score difference between  $\alpha$ -helix and  $\beta$ -sheet predictions based on Tango<sup>1</sup> analysis, and the predicted classification of each peptide as a fibril-forming peptide (ff-peptide) with either  $\alpha$ -helical or secondary structure-switching (SSW) propensity.

**Table S5. Cryo-EM data collection, refinement and validation statistics**

|                                     | <b>Aurein 1.2</b>            |              | <b>Brevinin-10Kc</b> |              |                 |                  |
|-------------------------------------|------------------------------|--------------|----------------------|--------------|-----------------|------------------|
|                                     | ddH2O Pol I                  | ddH2O Pol II | ddH2O Pol I          | ddH2O Pol II | PBS pH6.5 Pol I | PBS pH6.5 Pol II |
| Magnification                       | 105000                       |              | 105000               |              | 105000          |                  |
| Voltage (kV)                        | 300                          |              | 300                  |              | 300             |                  |
| Electron Exposure                   | 40                           |              | 50                   |              | 50              |                  |
| Defocus range                       | -0.5,-1,-1.5,-2,-2.5,-3,-3.5 |              | -0.5 to -2           |              | -0.5 to -2      |                  |
| Pixel size                          | 0.85                         |              | 0.85                 |              | 0.825           |                  |
| Nr. of micrographs                  | 13396                        |              | 10018                |              | 6236            |                  |
| Nr. of initial particles            | 1418345                      | 131027       | 1569255              | 443921       | 1523940         | 328282           |
| Nr. of particles for reconstruction | 185612                       | 90810        | 349067               |              | 498395          | 312286           |
| Symmetry imposed                    | C2                           | C1           | C1                   | C2           | C2              | C2               |
| Cross-over (Å)                      |                              |              |                      |              |                 |                  |
| Twist (°)                           | -1.18                        | -2.40        | -180.76              |              | 59.49           | 59.5             |
| Rise (Å)                            | 4.84                         | 4.84         | 2.39                 |              | 1.6             | 1.6              |
| Map resolution (Å)                  | 2.80                         | 3.78         | 3.31                 |              | 2.17            | 2.28             |
| Map B-factor(Å²)                    | -71                          | -110         | -91                  |              | -36             | -34              |
|                                     |                              |              |                      |              |                 |                  |
| Molprobitry                         | 1.49                         | 1.94         | 1.45                 |              | 0.86            | 1.06             |



|            |       |       |      |  |      |       |
|------------|-------|-------|------|--|------|-------|
| score      |       |       |      |  |      |       |
| Clashscore | 1.72  | 2.29  | 8.20 |  | 1.34 | 2.71  |
| Rama Plot  |       |       |      |  |      |       |
| Favoured   | 97.73 | 90.15 | 100  |  | 100  | 99.17 |
| Allowed    | 2.27  | 9.85  | 0    |  | 0    | 0.83  |
| Outlier    | 0     | 0     | 0    |  | 0    | 0     |

This table provides the parameters and statistics for the data collection, processing, refinement, and structure validation of the cryo-EM structures. Refinement statistics were generated using either the Phenix or Servalcat package <sup>2,3</sup>.

**Figure S1. Thioflavin-T fibrillation kinetics assay**

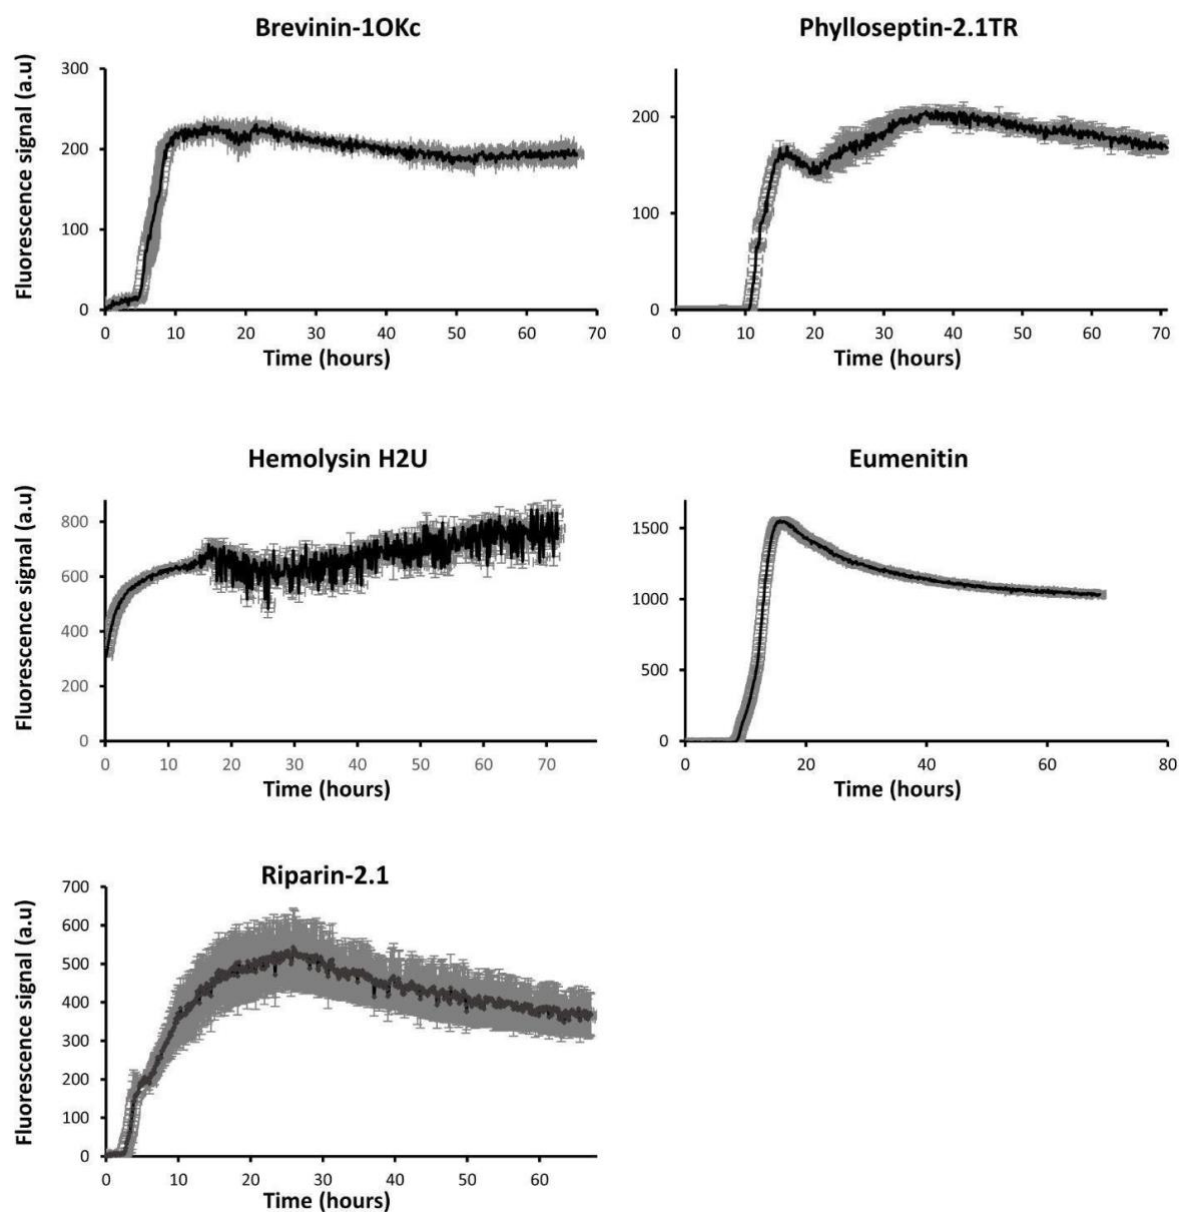

Fibrillation kinetics assays were performed using 100  $\mu$ M peptide and 200  $\mu$ M ThT in a potassium phosphate buffer at pH 7.4. The graph shows mean fluorescence readings of triplicate measurements of the peptides over a period of 70-80 hours. Error bars represent the standard error of the mean. The peptides display a characteristic fibrillation curve, following a lag time varying from 1-10 hours. The peptides not mentioned here failed to produce any fluorescence signal above negative control levels.

**Figure S2. Secondary structure analysis of the peptides in the solid state using Attenuated total internal reflection (ATR) Fourier transform infrared (FTIR) spectroscopy**

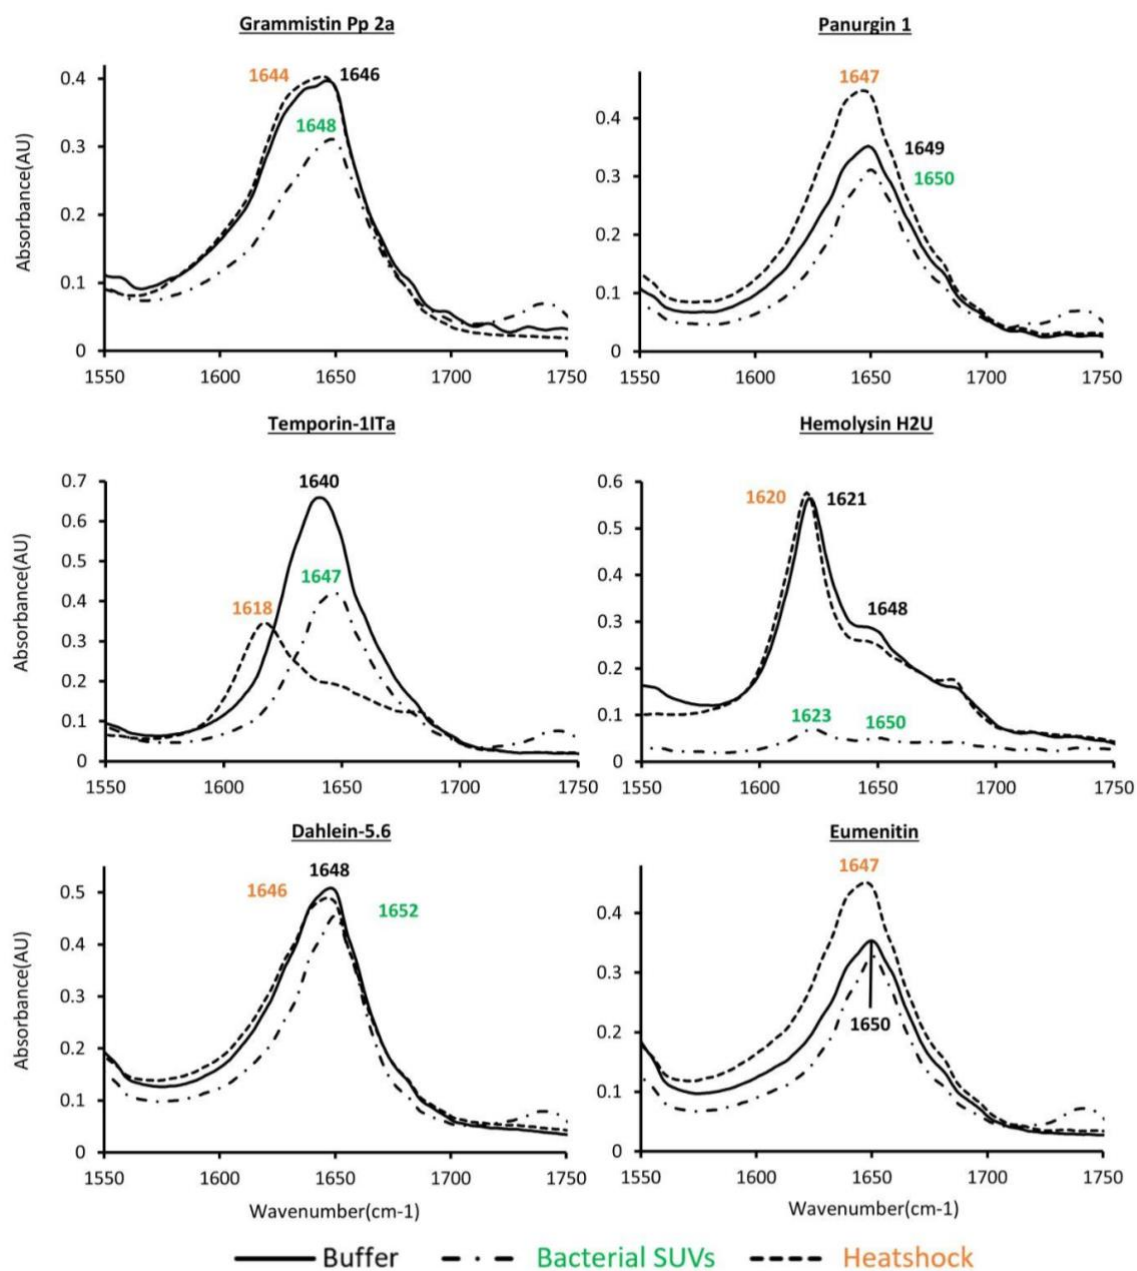

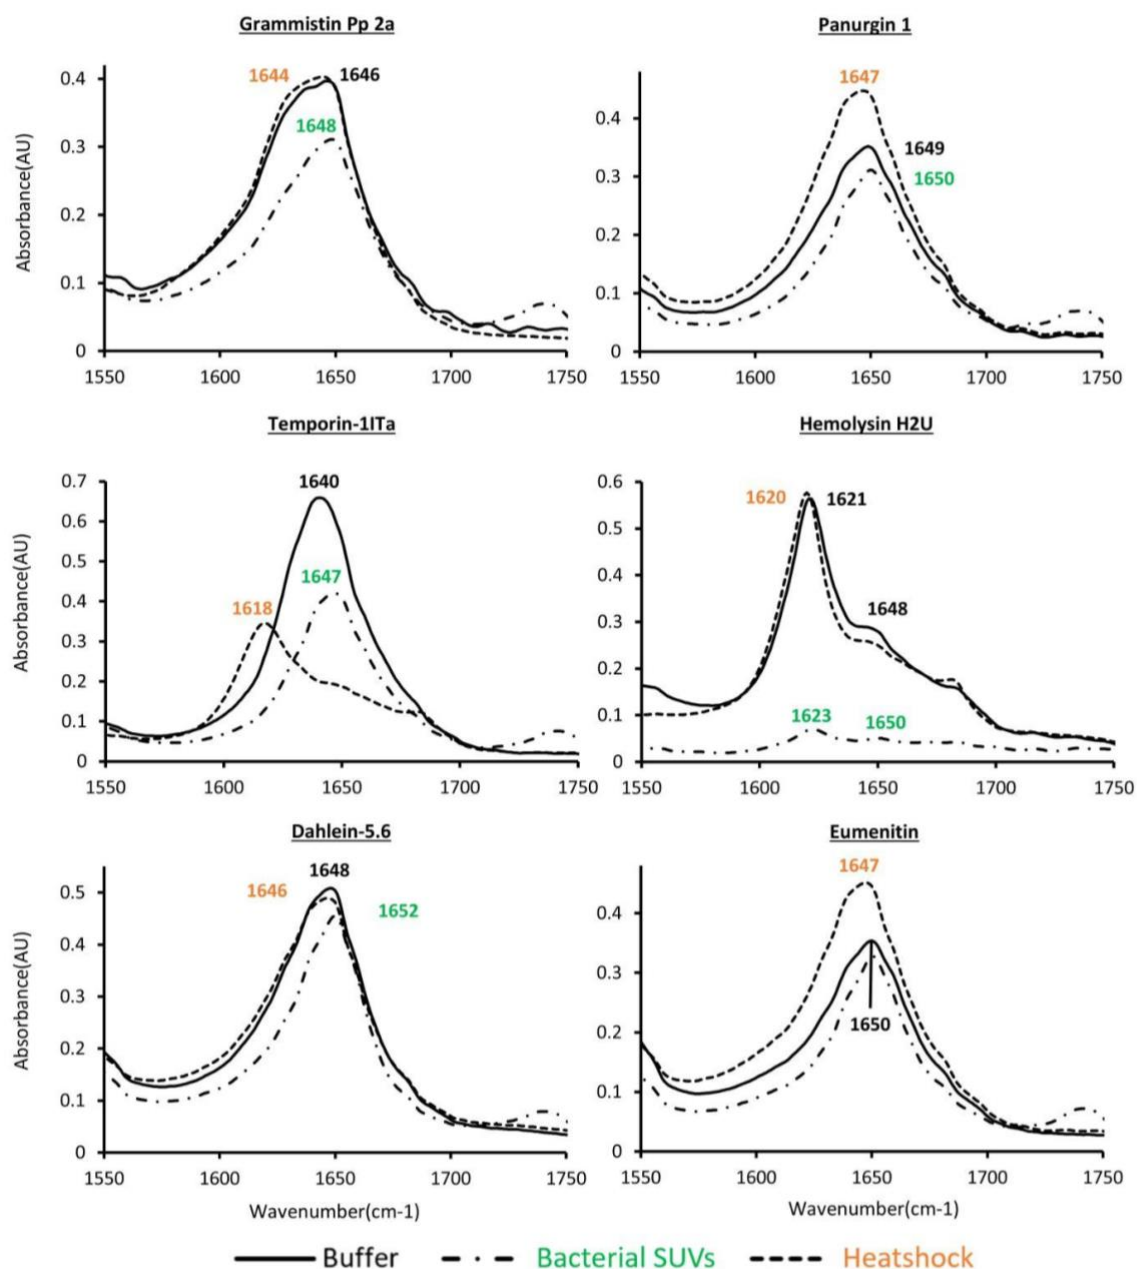

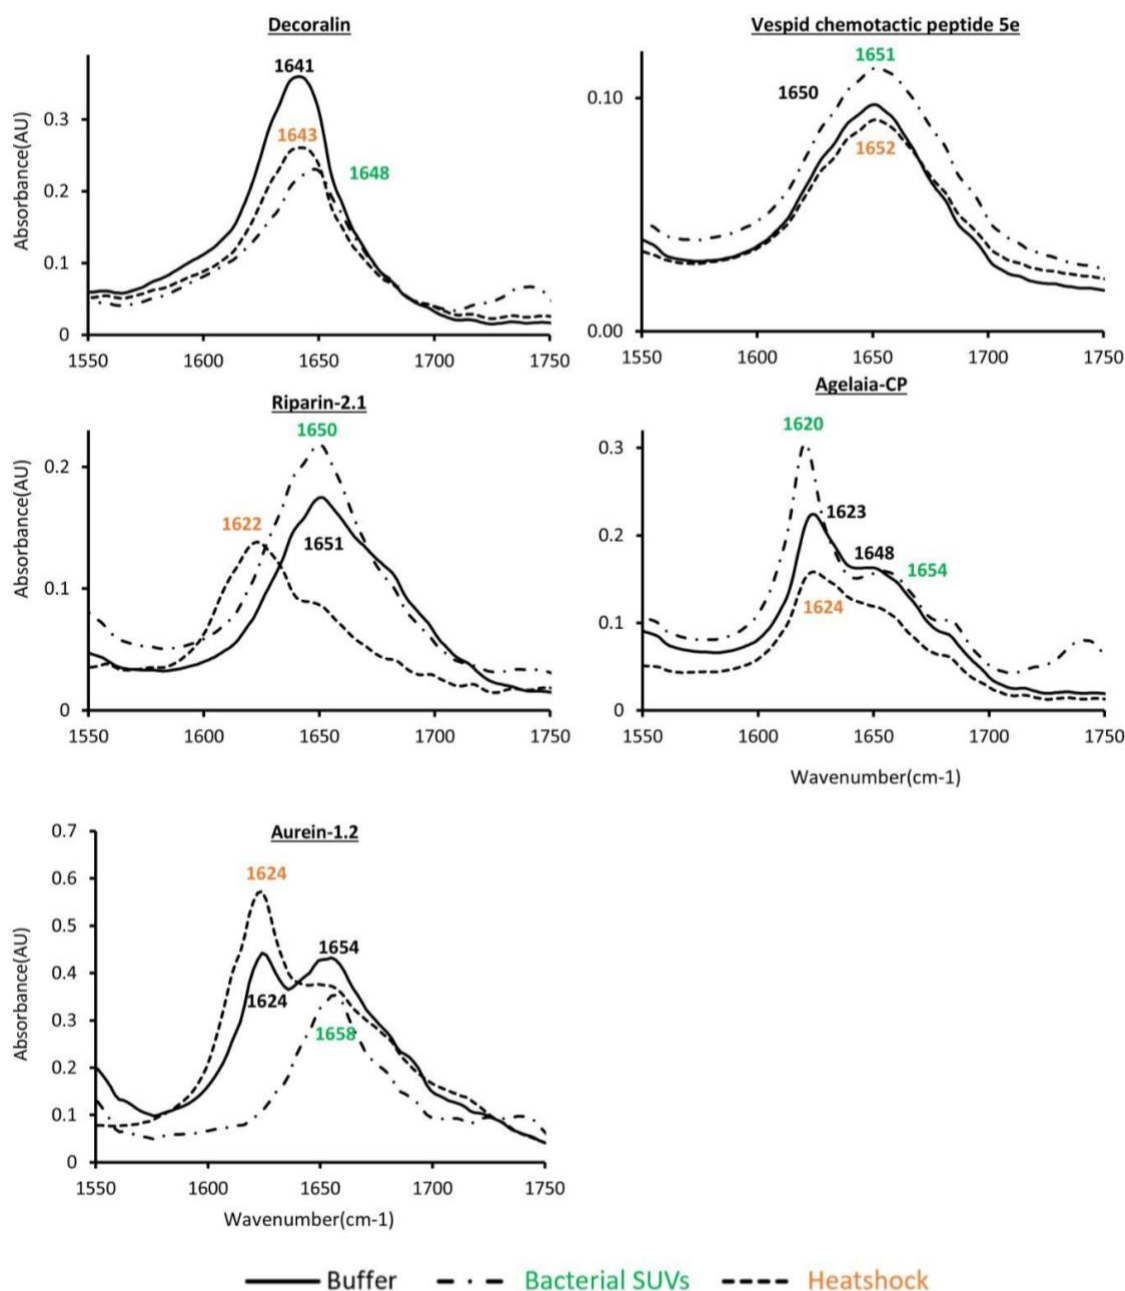

Spectra of the amide I' region under various conditions. All peptides were incubated for 2 hours in a 10 mM sodium phosphate buffer at pH 7.5. Solid curve: spectra of peptides solely in buffer. Dashed curve: peptides incubated in buffer in the presence of liposomes composed of 1:1 DOPE: DOPG, mimicking a Gram-positive bacterial membrane. Dotted curve: spectra are of the peptides incubated in the buffer for 2 hours and then subjected to a heat shock at 80°C for 10 minutes. The peaks are described by number and colored by condition: buffer (black), presence of liposome's (green), and after heat shock (orange). The peaks were determined based on the calculated second derivative provided by the OMNIC software. The equipment and software services were provided by the Laboratory for Physical Measurements, managed by Dr. Inna Zeltser from the Department of Materials Science and Engineering at the Technion - Israel Institute of Technology.

**Figure S3. Cryo-EM representative micrographs and 2D class averages of aurein 1.2**

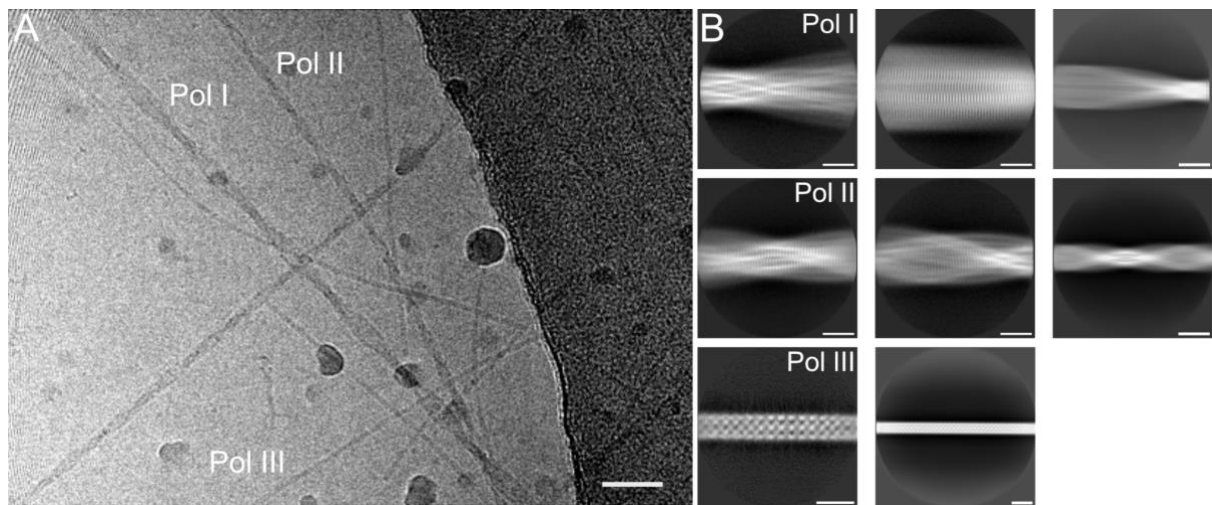

Three main fibril polymorphs of aurein 1.2 were observed in ddH<sub>2</sub>O. Polymorphs I and II displayed well-defined twists, clearly visible in the micrographs (**A**) and corresponding 2D class averages (**B**). In addition, a third fibril type was detected which, in both micrographs and 2D classes, lacked any discernible twist and exhibited a 'checkerboard-like' arrangement, suggesting that it may not behave as a canonical amyloid fibril.

**Figure S4. Cryo-EM map and model overviews of aurein 1.2 polymorph I**

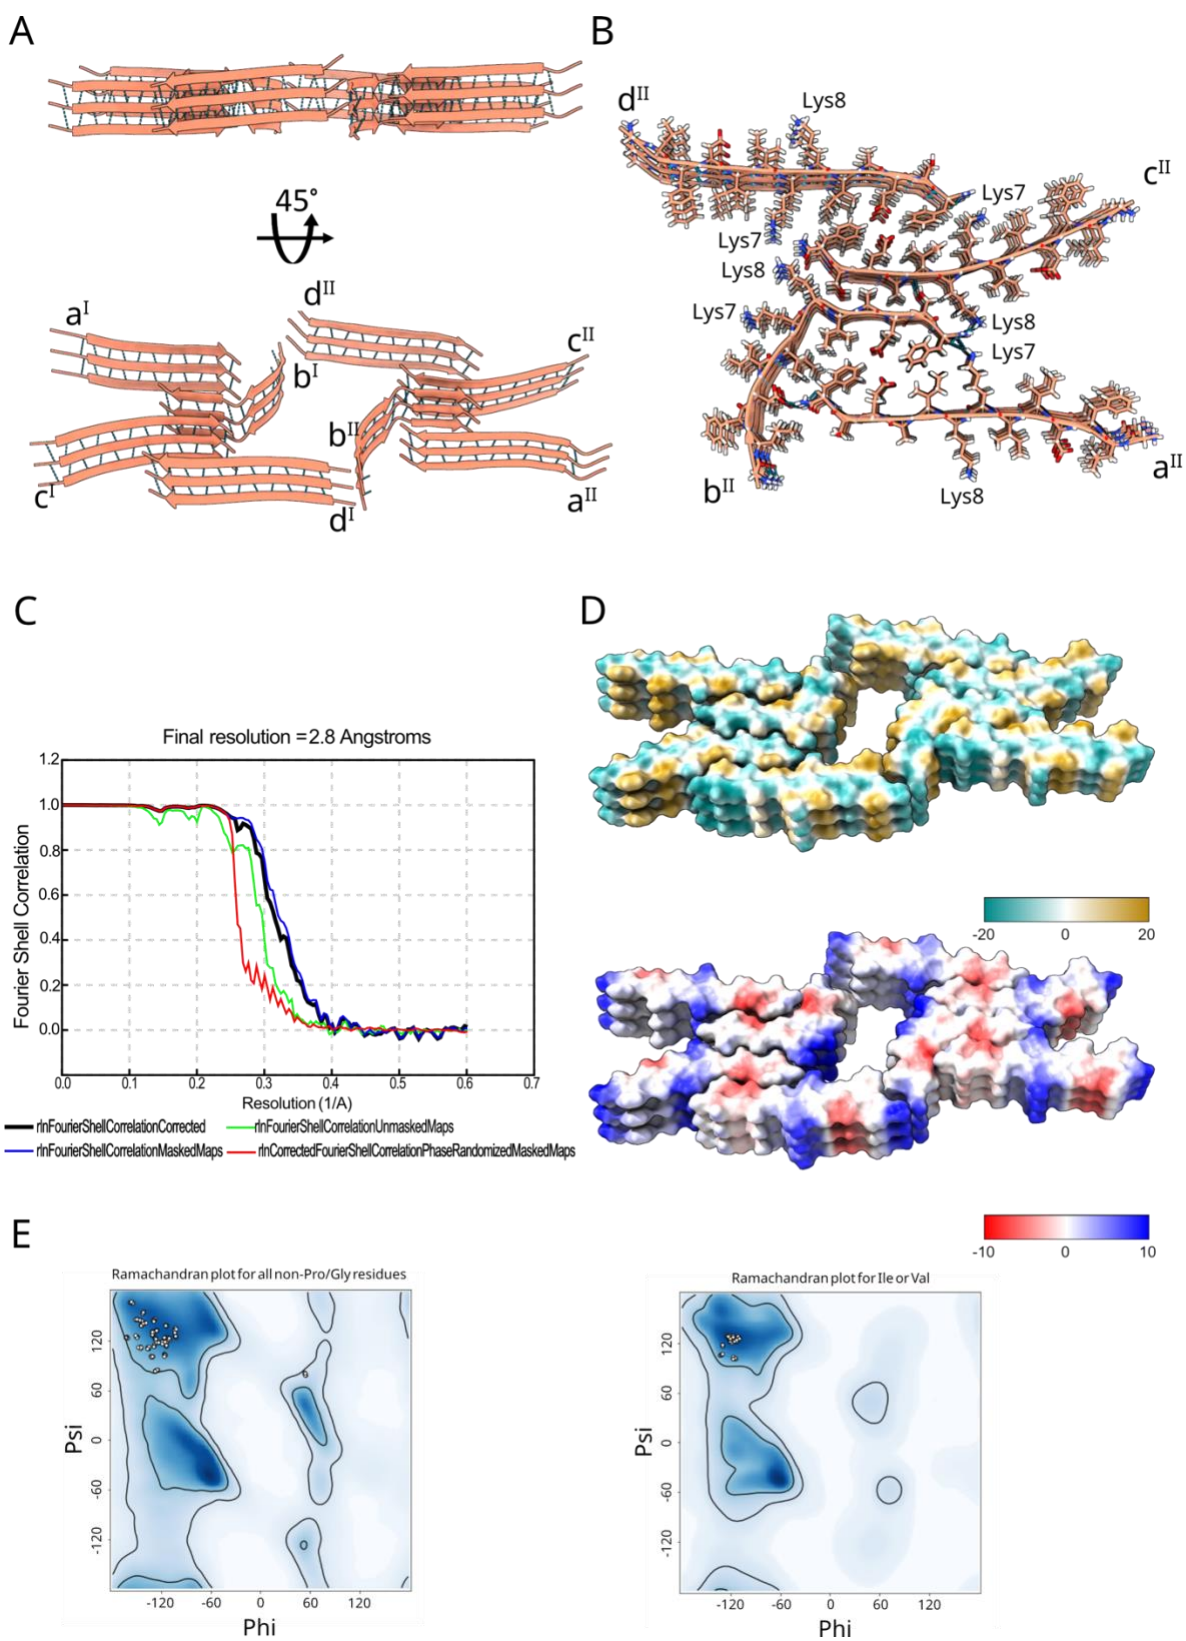

(**A**) Top and side views of the Polymorph I model highlighting hydrogen bond formation between the  $\beta$ -sheet layers. (**B**) Top-tilted view of one of the protofilaments showing side chains and illustrating the steric zipper interface. The conserved lysine residues are specifically indicated. (**C**) Gold-standard Fourier shell correlation (GSFSC) curve reported by Relion for the Polymorph I map. (**D**) Surface representations of Polymorph I are colored by calculated hydrophobic (top) and electrostatic (bottom) properties; scale bar included. (**E**) Ramachandran plot<sup>4</sup> of the final model, showing that most residues fall within the  $\beta$ -sheet range (top left) and one residue at the edge of the left handed  $\alpha$ -helix basin (top-middle right) consistent with the observed kink in the backbone conformation.



**Figure S5. Cryo-EM map and model overviews of aurein 1.2 polymorph II**

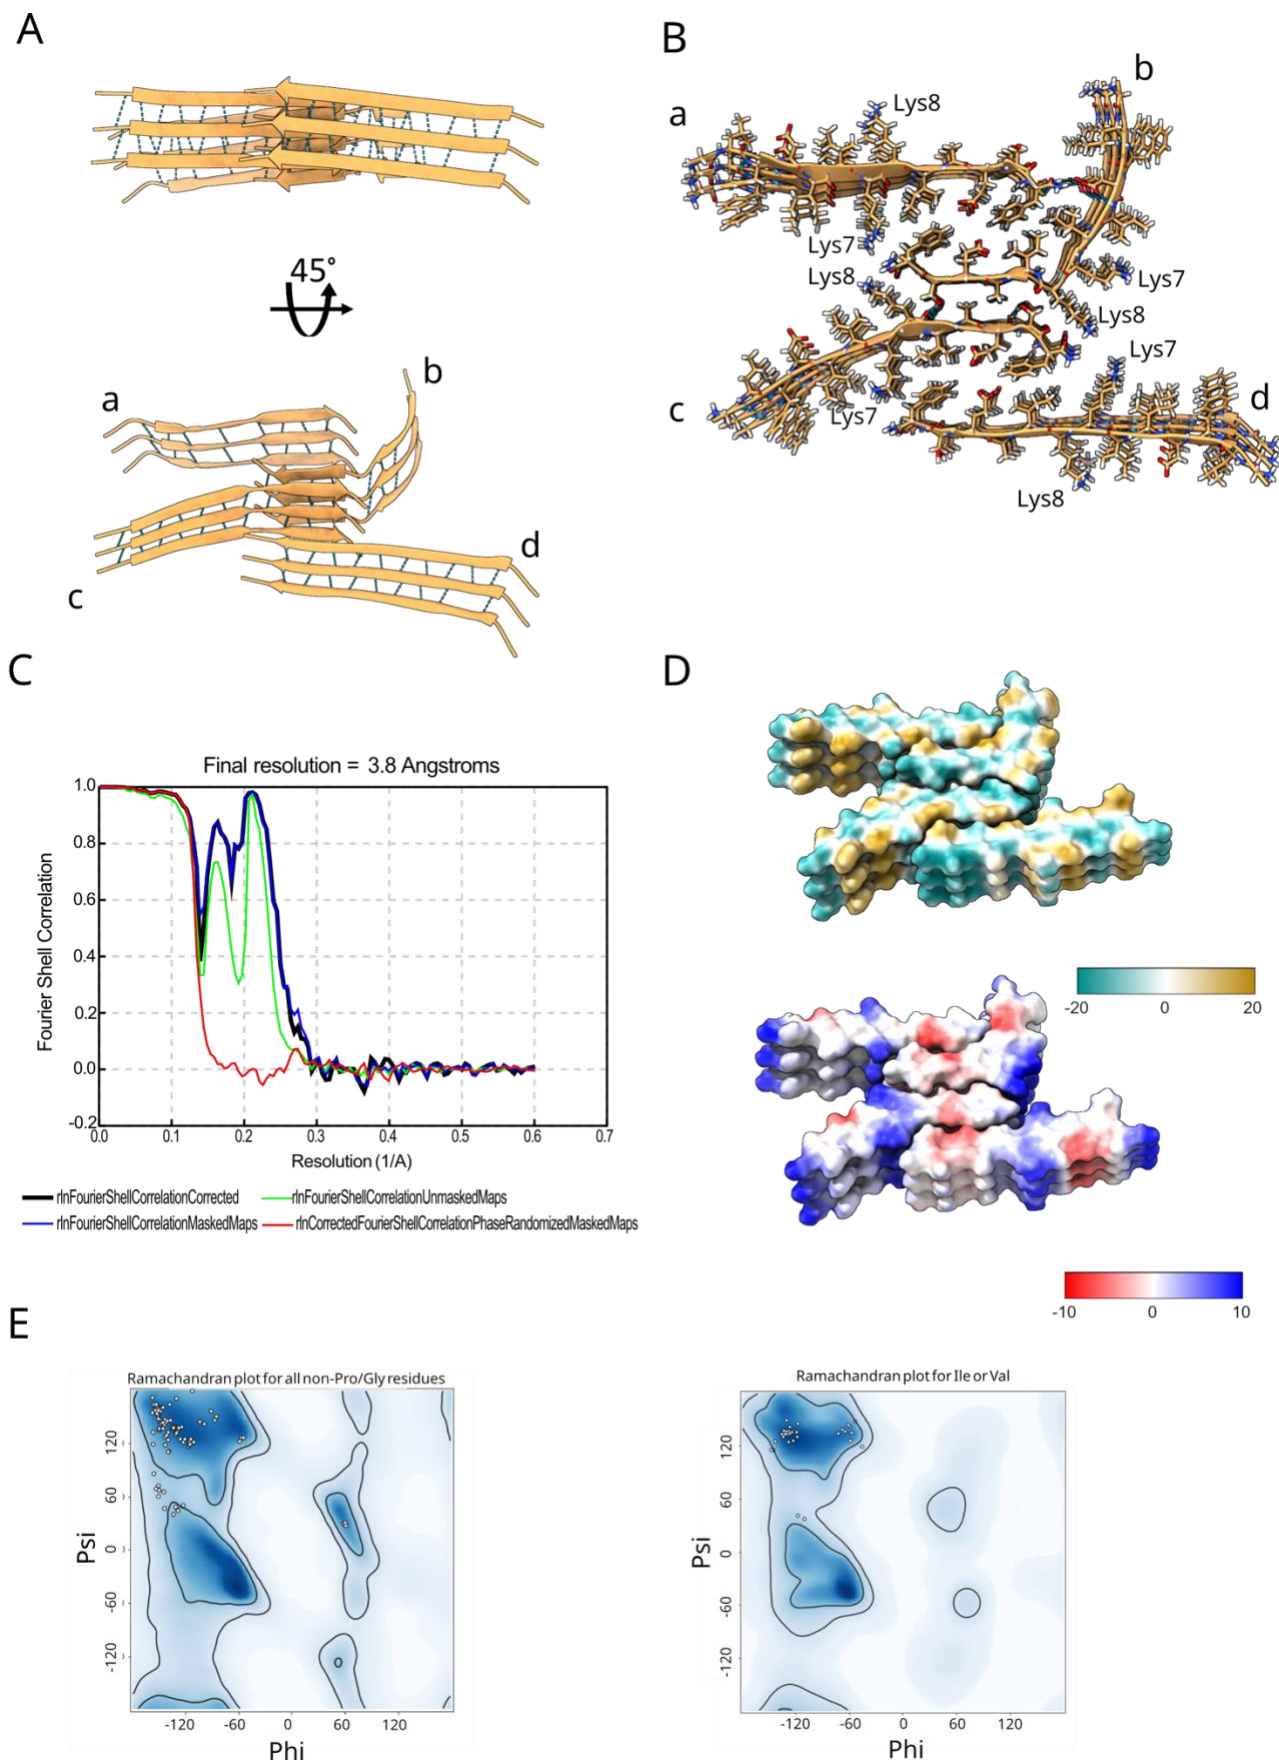

(**A**) Top and side views of the Polymorph II model highlighting hydrogen bond formation between the  $\beta$ -sheet layers. (**B**) Top-tilted view showing side chains and illustrating the steric zipper interface. The conserved lysine residues are specifically indicated. (**C**) GSFSC curve reported by Relion for the Polymorph II map. Of note, the covalent bond to the C-terminal amidation modification is not seen. (**D**) Surface representations of Polymorph II are colored by calculated hydrophobic (top) and electrostatic (bottom) properties; scale bar included. (**E**) Ramachandran plot<sup>4</sup> of the final model, showing that most residues fall within the  $\beta$ -sheet range (top left), with one residue located at the edge of the left-handed  $\alpha$ -helix basin (upper-middle right) and an additional cluster situated between the canonical  $\beta$ -sheet and  $\alpha$ -helical basins (left). This distribution likely reflects the kink within the  $\beta$ -sheets and the presence of extended or turn-like conformations, indicating deviations from a fully canonical  $\beta$ -sheet architecture, although the data can also be affected by the relatively low resolution of this polymorphs map (3.80 Å).

**Figure S6. Cryo-EM representative micrographs and 2D class averages of brevinin-10Kc fibrils under different incubation conditions**

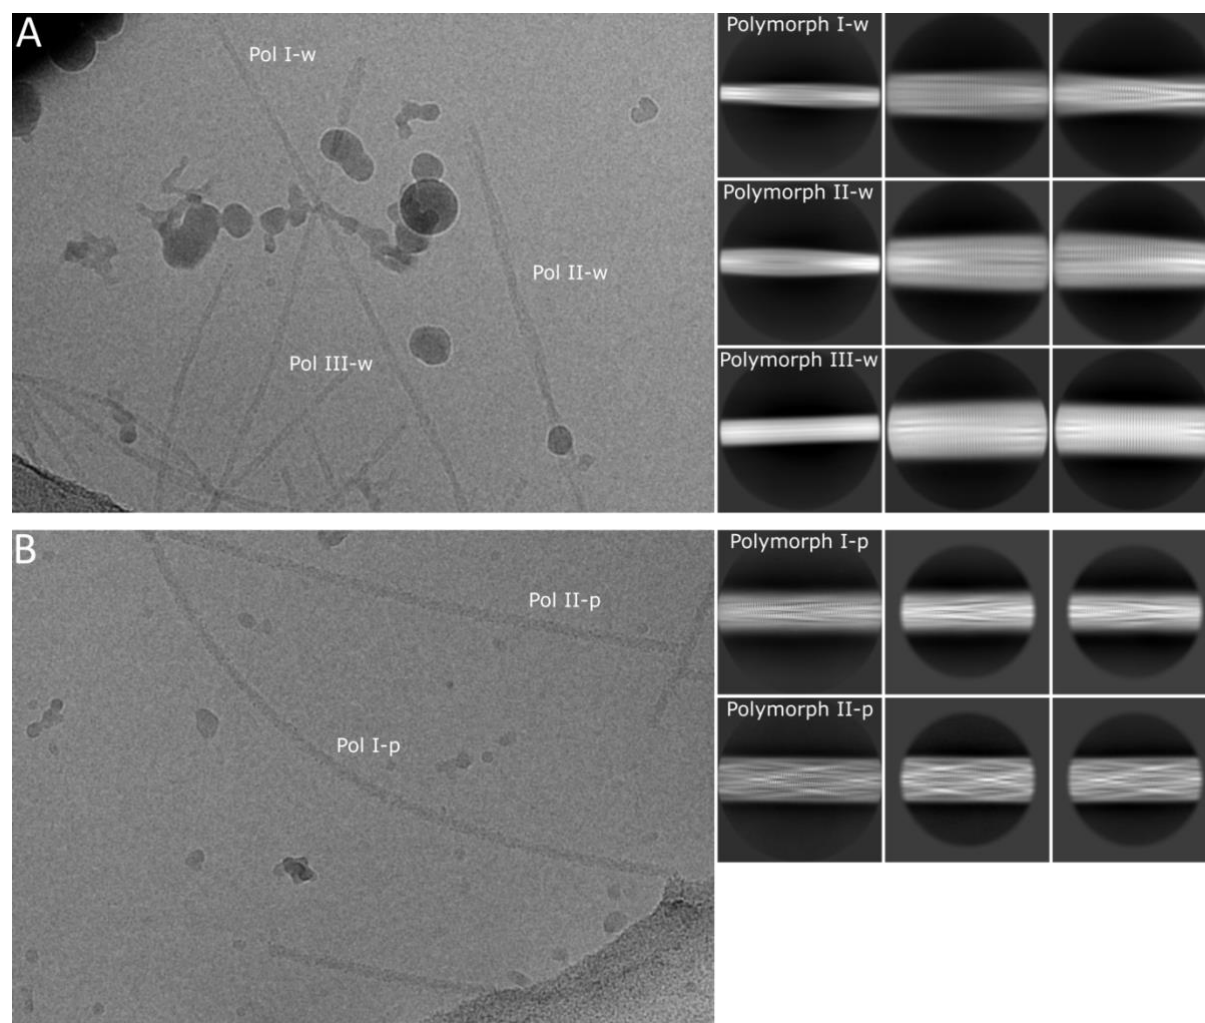

**(A)** Three fibril polymorphs were identified for brevinin-10Kc incubated in ddH<sub>2</sub>O. Polymorph I-w displays a well-defined screw-symmetric architecture with two peptide chains forming the ordered fibril core. Polymorph II-w also consists of two protofilaments arranged similarly to I-w. In contrast, Polymorph III-w shows no detectable helical twist, precluding high-resolution reconstruction by standard helical methods. **(B)** Two fibril polymorphs were observed for brevinin-10Kc incubated in 10 mM PBS at pH 6.5, designated I-p and II-p. These fibrils exhibit more complex amyloid architectures compared to those grown in ddH<sub>2</sub>O, yet remain consistent with a cross- $\beta$  arrangement, as indicated by the characteristic  $\sim 4.75$  Å layer line spacing and the pattern of hydrogen bonds (Figure S7-S9).

**Figure S7. Cryo-EM map and model overviews of brevinin-10Kc Polymorph I-w**

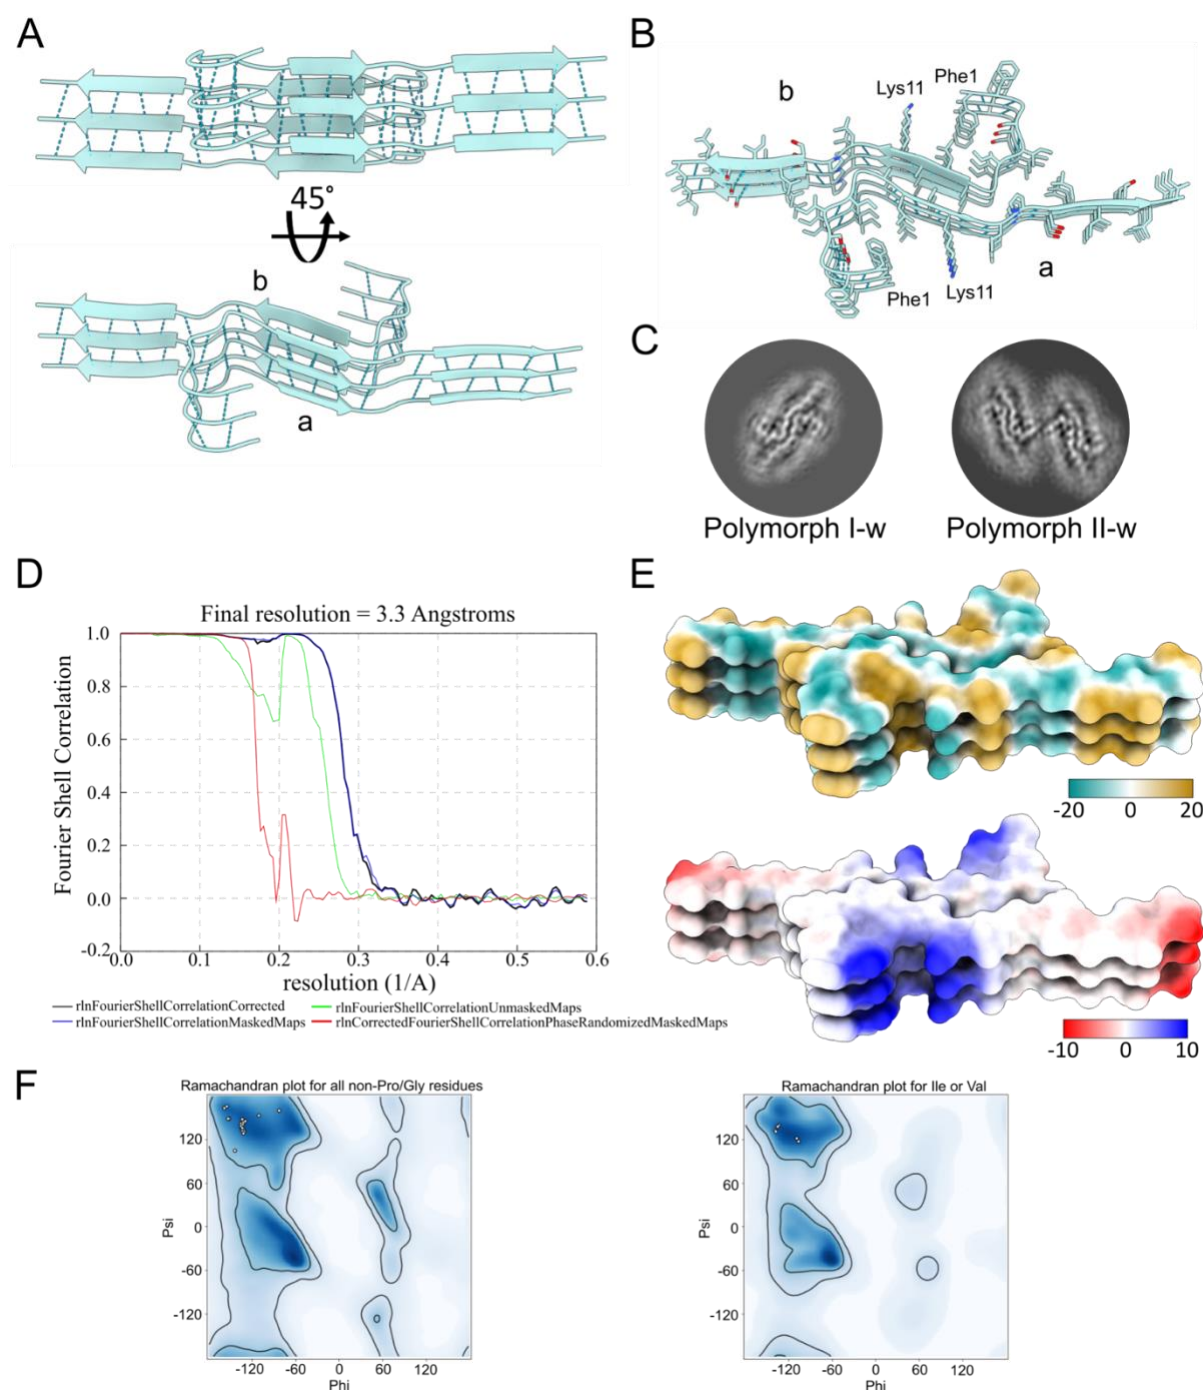

**(A)** Top and side views of the Polymorph I-w atomic model highlighting hydrogen bond formation between the  $\beta$ -sheet layers. **(B)** Top-tilted view showing side chains and illustrating the steric zipper interface. **(C)** Structural comparison of Polymorphs I-w and II-w. **(D)** GSFSC curve reported by Relion for the Polymorph I-w map. **(E)** Surface representations of Polymorph I-w are colored by calculated hydrophobic (top) and electrostatic (bottom) properties; scale bar included. **(F)** Ramachandran plot<sup>4</sup> of the final model, showing that most residues fall within the  $\beta$ -sheet region (top left). In this polymorph, the kink is introduced by a glycine residue, which does not appear as a deviation in the Ramachandran plot due to its broader conformational flexibility.



**Figure S8. Cryo-EM map and model overviews of brevinin-10Kc Polymorph I-p**

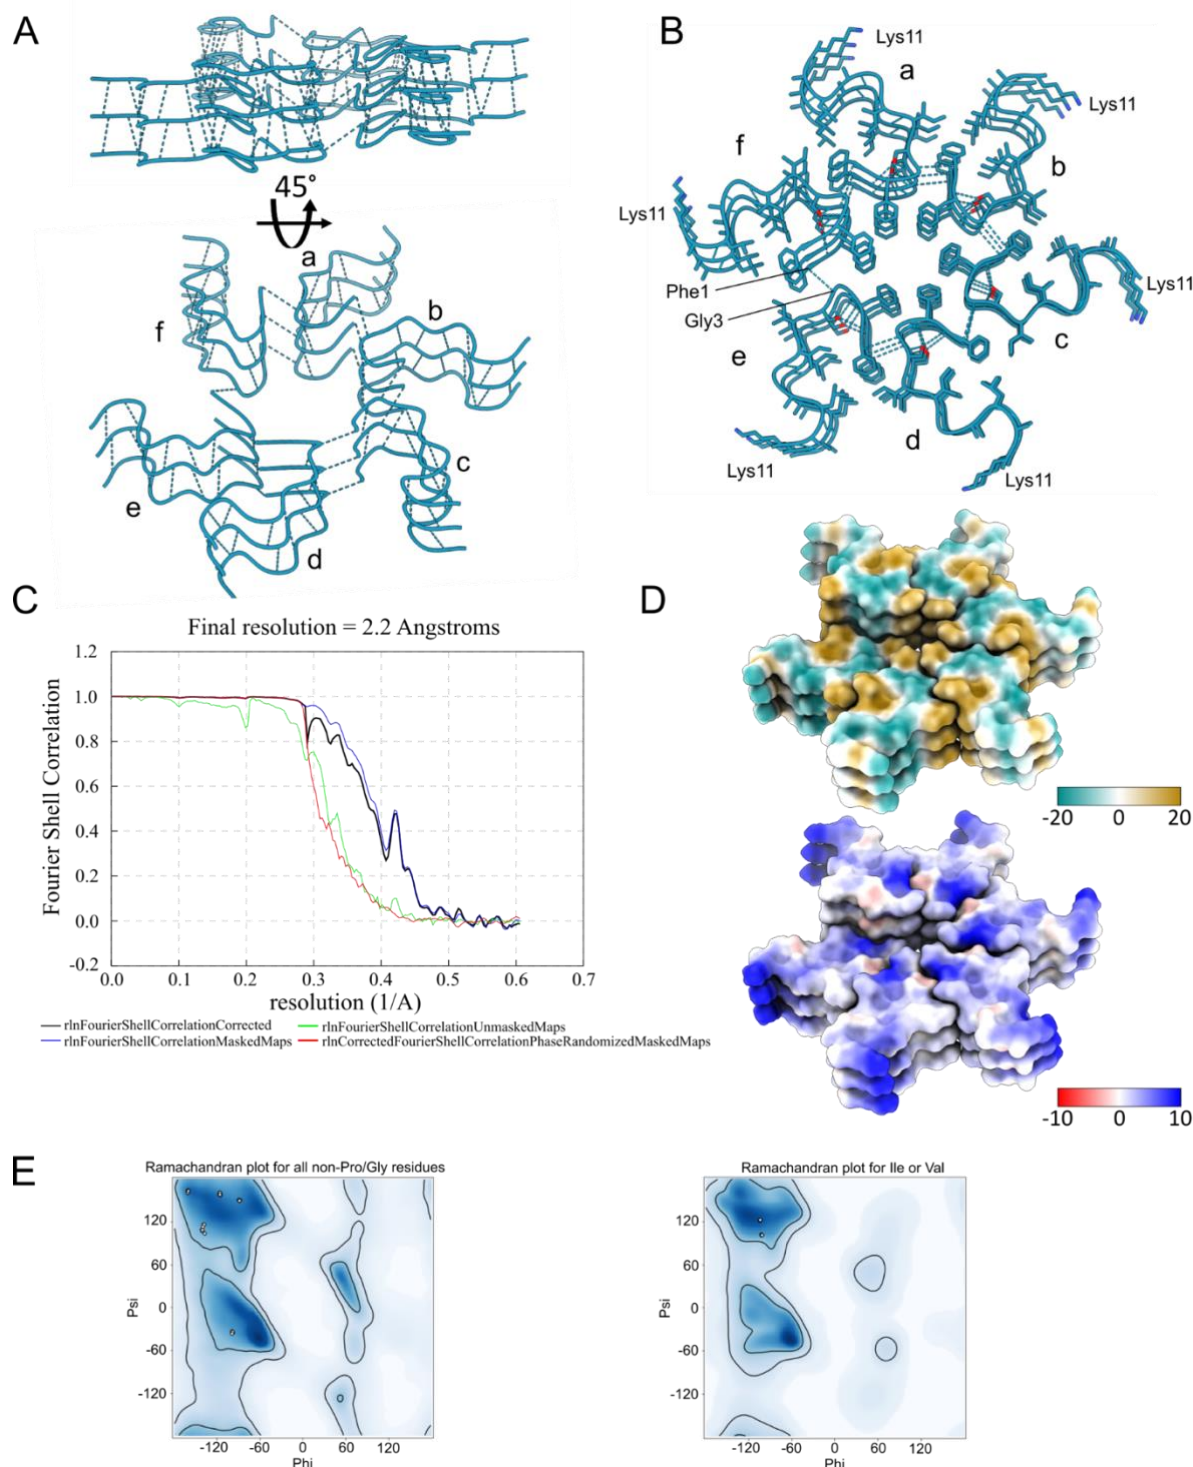

**(A)** Top and side views of the Polymorph I-p atomic model highlighting hydrogen bond formation between the  $\beta$ -sheet layers and between  $\beta$ -sheets. **(B)** Top-tilted view showing side chains and illustrating the steric zipper interface. **(C)** GSFSC curve reported by Relion for the Polymorph I-p map. **(D)** Surface representations of Polymorph I-p are colored by calculated hydrophobic (top) and electrostatic (bottom) properties; scale bar included. **(E)** Ramachandran plot<sup>4</sup> of the final model, showing that most residues fall within the  $\beta$ -sheet range (top left), with one residue positioned within a region indicating a right-handed or a tighter  $\alpha$ -helix (lower-middle left), likely reflecting the kink.

**Figure S9. Cryo-EM map and model overviews of brevinin-10Kc Polymorph II-p**

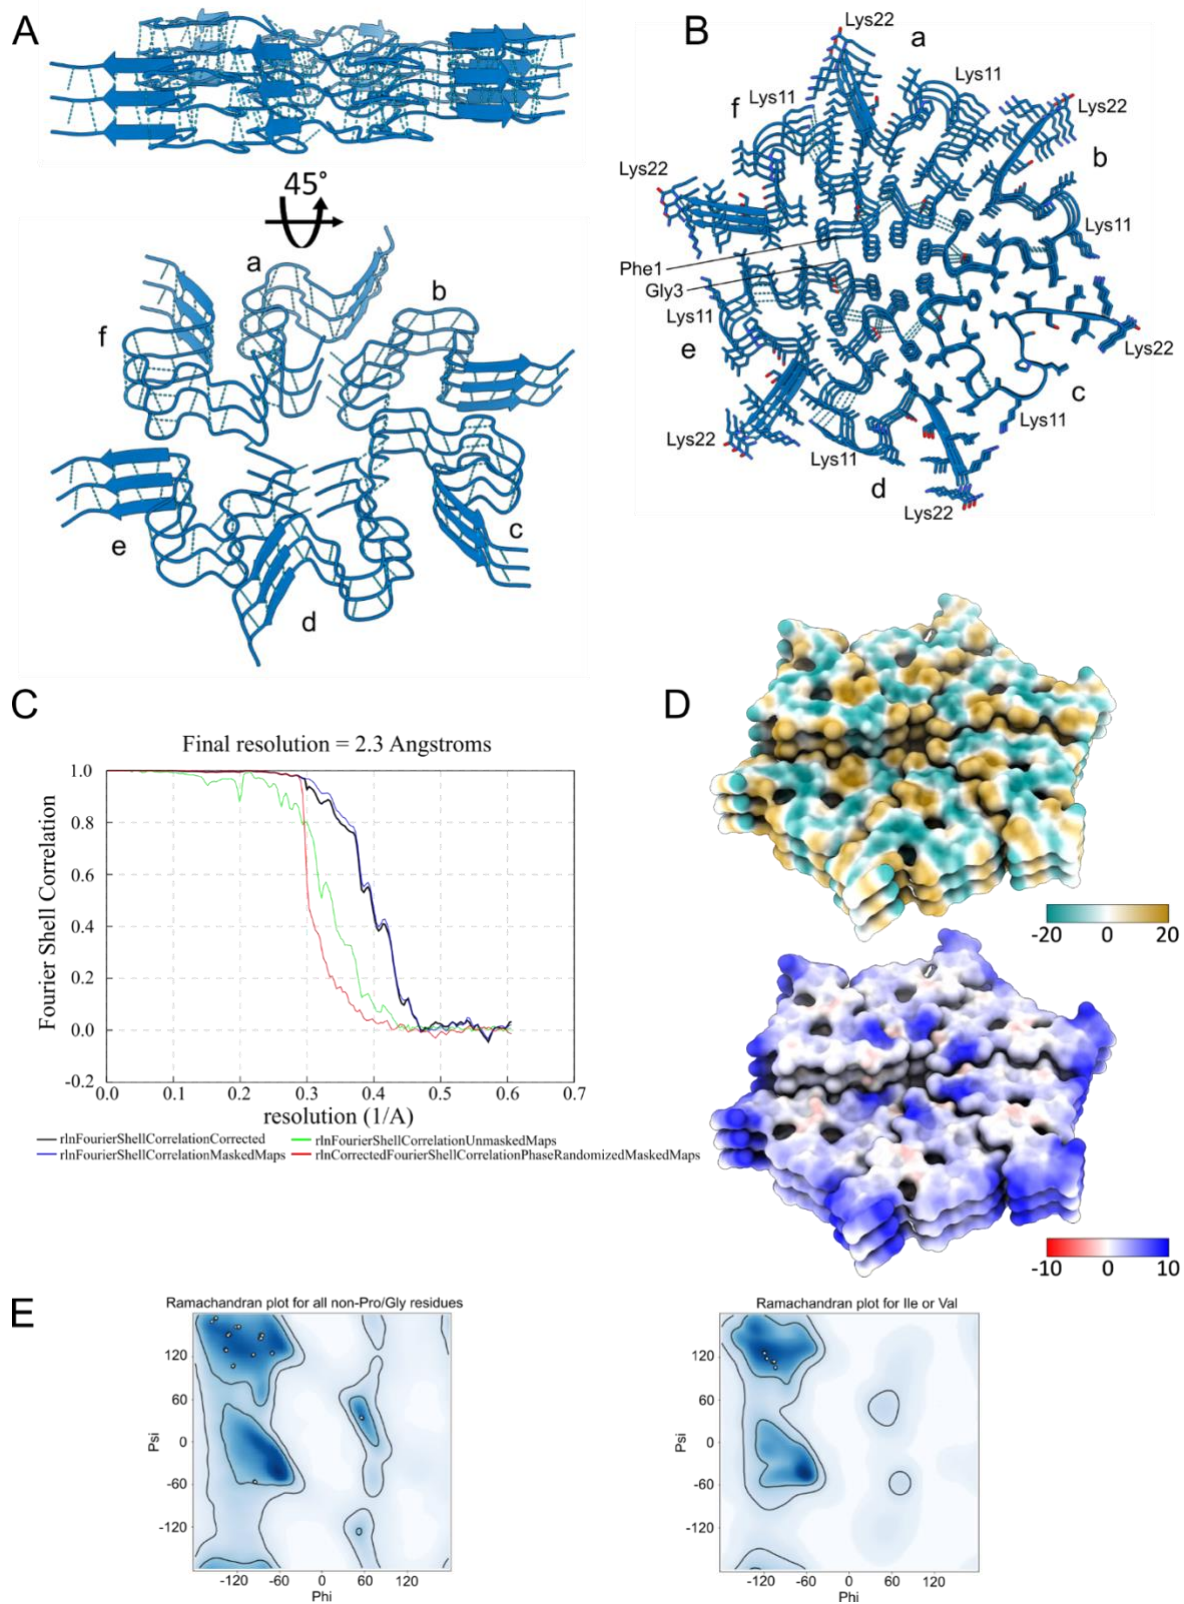

(A) Top and side views of the Polymorph II-p atomic model highlighting hydrogen bond formation between the  $\beta$ -sheet layers and between  $\beta$ -sheets. (B) Top-tilted view showing side chains and illustrating the steric zipper interface. (C) GSFSC curve reported by Relion for the Polymorph II-p map. (D) Surface representations of Polymorph II-p are colored by calculated hydrophobic (top) and electrostatic (bottom) properties; scale bar included. (E) Ramachandran plot<sup>4</sup> of the final model, showing that most residues fall within the  $\beta$ -sheet range (top left), with one residue located near the boundary of the  $\alpha$ -helical basin (middle–lower left), consistent with a right-handed  $\alpha$ -helix, a tighter  $3_{10}$ -helix, or a turn-like conformation, while another residue falls within the left-handed  $\alpha$ -helix region (upper right). This distribution likely reflects the kink within the  $\beta$ -sheets and the presence of extended or turn-like conformations, indicating deviations from a fully canonical  $\beta$ -sheet architecture.

**Figure S10. Sequence comparison of amphibian AMPs**

|                     |                                          |
|---------------------|------------------------------------------|
| <b>Aurein 3.3</b>   | <b>GLFDIVKKIAGHIVSSI</b>                 |
| <b>Aurein 1.2</b>   | <b>GLFDIIKKIAESF</b> <sub>-NH2</sub>     |
| <b>Citropin 1.3</b> | <b>GLFDIIKKVASVIGGL</b> <sub>-NH2</sub>  |
| <b>Uperin 3.5</b>   | <b>GVGDLIRKAVSVIKNIV</b> <sub>-NH2</sub> |

Sequences of several amyloid-forming AMPs from the aurein, citropin and uperin families with known structures<sup>5–7</sup> are shown. Residues identical in at least two peptides are highlighted in red, while positions with residues sharing similar biophysical properties are marked in green.

## References

1. Rousseau, F., Schymkowitz, J. & Serrano, L. Protein aggregation and amyloidosis: confusion of the kinds? *Curr. Opin. Struct. Biol.* **16**, 118–126 (2006).
2. Liebschner, D. *et al.* Macromolecular structure determination using X-rays, neutrons and electrons: recent developments in Phenix. *Acta Crystallogr. D Struct. Biol.* **75**, 861–877 (2019).
3. Yamashita, K., Palmer, C. M., Burnley, T. & Murshudov, G. N. Cryo-EM single-particle structure refinement and map calculation using Servalcat. *Acta Crystallogr. D Struct. Biol.* **77**, 1282–1291 (2021).
4. Ramachandran, G. N., Ramakrishnan, C. & Sasisekharan, V. Stereochemistry of polypeptide chain configurations. *J. Mol. Biol.* **7**, 95–99 (1963).
5. Strati, F. *et al.* Structural and functional versatility of the amyloidogenic non-amidated variant of the antimicrobial peptide citropin 1.3. *Adv. Sci. (Weinh.)* e03997 (2025) doi:10.1002/advs.202503997.
6. Bückner, R. *et al.* The Cryo-EM structures of two amphibian antimicrobial cross- $\beta$  amyloid fibrils. *Nat. Commun.* **13**, 4356 (2022).
7. Salinas, N. *et al.* The amphibian antimicrobial peptide uperin 3.5 is a cross- $\alpha$ /cross- $\beta$  chameleon functional amyloid. *Proceedings of the National Academy of Sciences* **118**, (2021).
